# Supplementary material for: The feline skin microbiota: The bacteria inhabiting the skin of healthy and allergic cats
Source: PLoS One. 2017 Jun 2;12(6):e0178555. doi: 10.1371/journal.pone.0178555 (PMC5456077; doi:10.1371/journal.pone.0178555)
Supplement: S1 Table — Values represent averages with standard deviations in parenthesis. Superscript letters represent sites that were significantly different according to Kruskal-Wallis tests with p<0.05. (DOCX) [file pone.0178555.s001.docx]

Table S1. Alpha diversity averages at 3100 sequences per sample for healthy cats

|  | Chao1 | Observed OTUs | Shannon |
| --- | --- | --- | --- |
| Body Site |  |  |  |
| Axilla | 226 (59) | 149 (48) | 5.53 (0.46) |
| Chin | 296 (163) | 201 (132) | 5.59 (1.13) |
| Conjunctiva | 133 (19)C,A | 78 (12)C,A | 3.66 (0.65)A,C |
| Dorsal Nose | 282 (164)CJ | 203 (104)CJ | 6.00 (0.60)CJ |
| Ear Canal | 155 (71)C,A,DN | 103 (40)DN,C | 4.30 (1.02)DN,A,C |
| Groin | 272 (137)CJ,EC | 187 (99)CJ | 5.52 (1.10)CJ,EC |
| Interdigital | 348 (222)CJ,EC | 237 (174)CJ,EC | 5.87 (1.22)CJ,EC |
| Lumbar | 221 (74)CJ | 134 (40)CJ | 5.02 (1.05)CJ,DN |
| Nostril | 152 (106)ID,C,DN,A,G,L | 90 (56)DN,C,G,I,A,L | 3.18 (1.66)DN,A,I,C,G,L |
| Oral | 175 (26)ID,CJ,A,DN,C | 129 (22)CJ,N,DN | 4.78 (0.59)DN,CJ,A,I,N,G |
| Pre-aural space | 471 (372)O,CJ,EC,N,A,L | 319 (237)CJ,N,O,EC,L,A | 6.39 (1.05)CJ,O,N,EC,L,A |
| Reproductive (F) | 115 (44)PAS,ID,A,C,DN,G,L,O | 72 (23)DN,PAS,C,A,G,O,L,ID | 2.16 (1.43)A,DN,PAS,C,I,G,L,O,EC |
| Reproductive (M) | 169 (48)PAS,C | 94 (22)DN,PAS,C,G,O,A,ID | 3.48 (0.89)DN,PAS,A,I,C,G,O,L |

Values represent averages with standard deviations in parenthesis. Superscript letters represent sites that were significantly different according to Kruskal-Wallis tests with p<0.05.
